# Supplementary material for: Chlorogenic acid inhibits NLRP3 inflammasome activation through Nrf2 activation in diabetic nephropathy
Source: PubMed Central journal article supplement (PMC11703029; doi:10.1371/journal.pone.0316615), 2025-01-06
Supplement: pone.0316615.s002.pdf [file pone.0316615.s002.pdf]

Fig 3. A

NLRP3

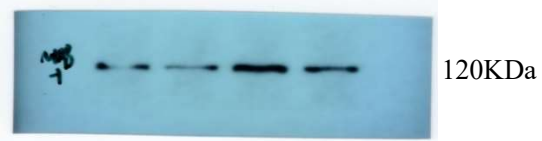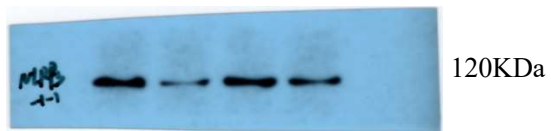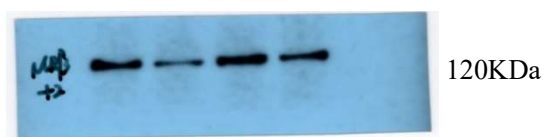

c-capsase-1

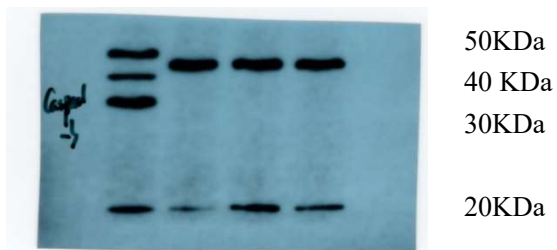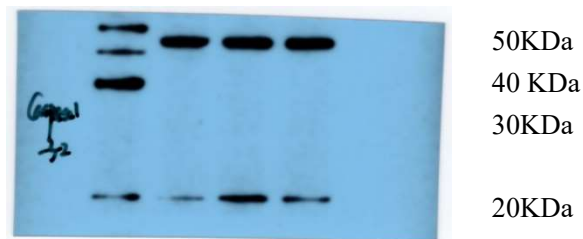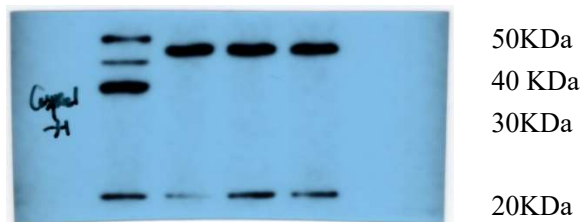

IL-1 $\beta$

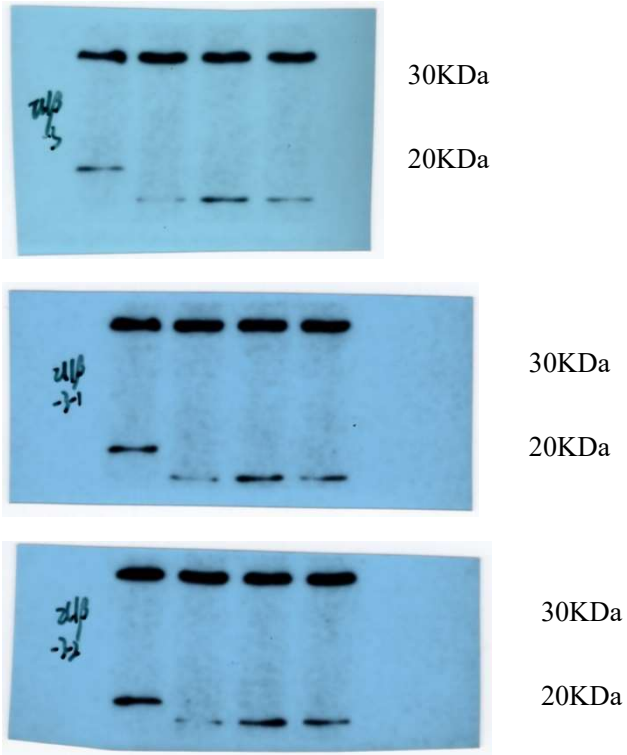

IL-18

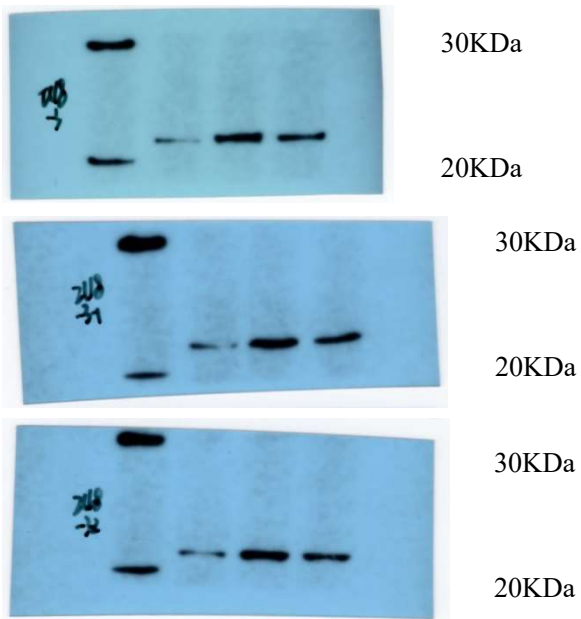

Fig 3. C

Nrf2

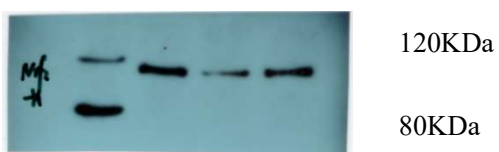

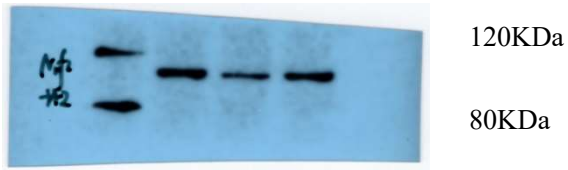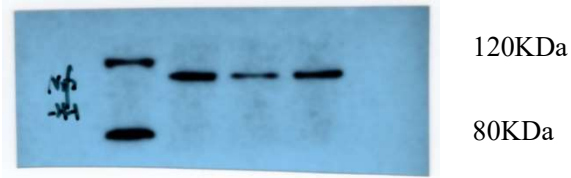

### HO-1

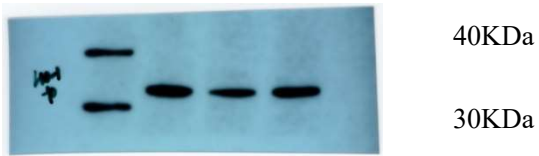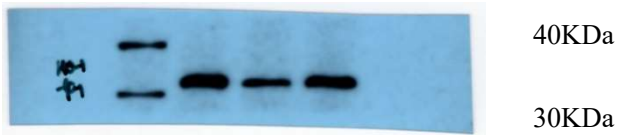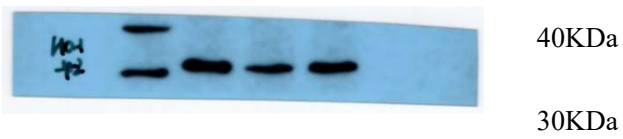

Fig 4. A

### NLRP3

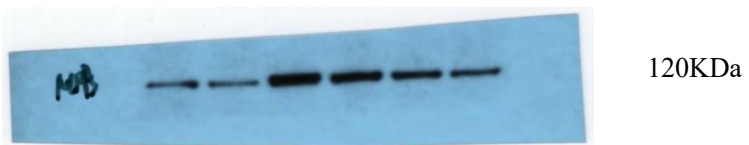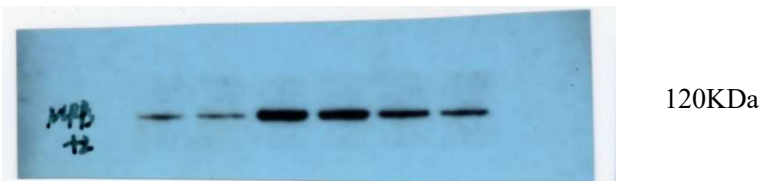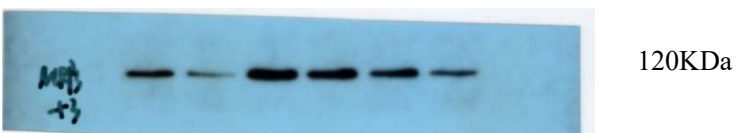

### c-capsase-1

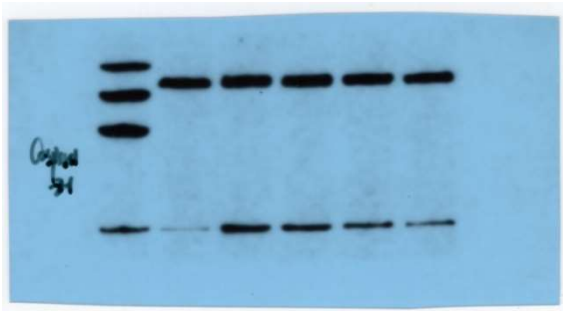

50KDa  
40 KDa  
30KDa  
20KDa

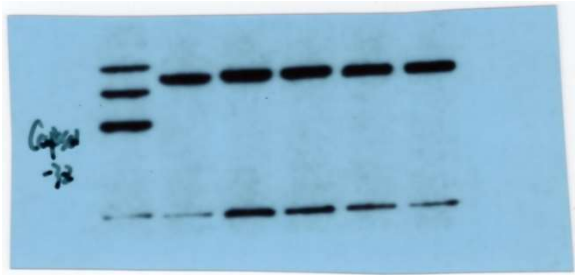

50KDa  
40 KDa  
30KDa  
20KDa

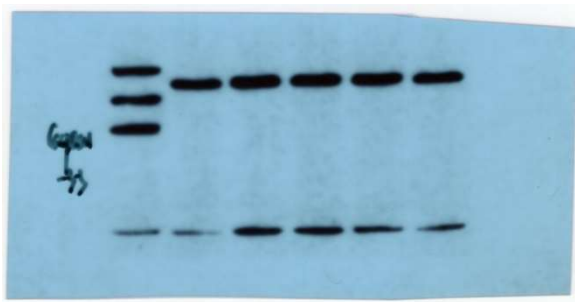

50KDa  
40 KDa  
30KDa  
20KDa

IL-1 $\beta$

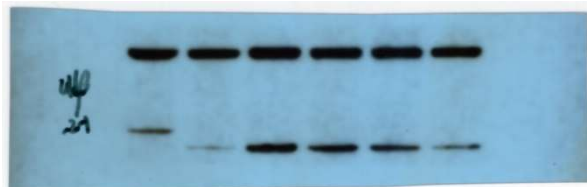

30KDa  
20KDa

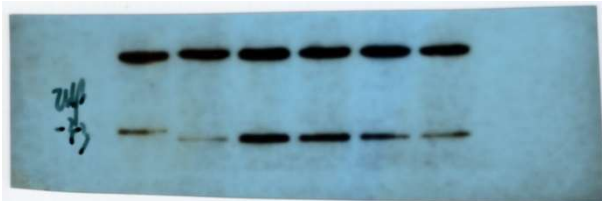

30KDa  
20KDa

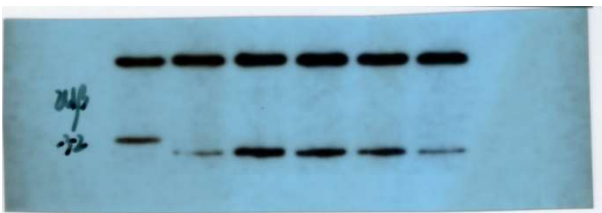

30KDa  
20KDa

IL-18

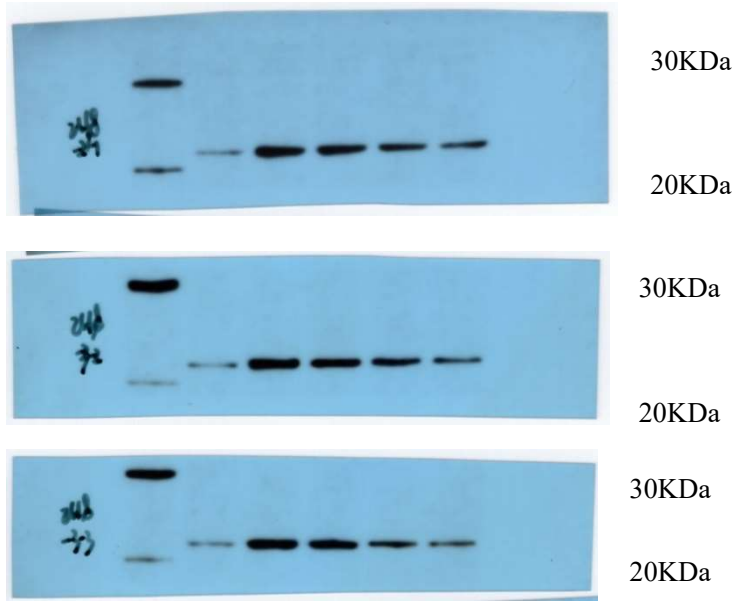

Fig 4. B

Nrf2

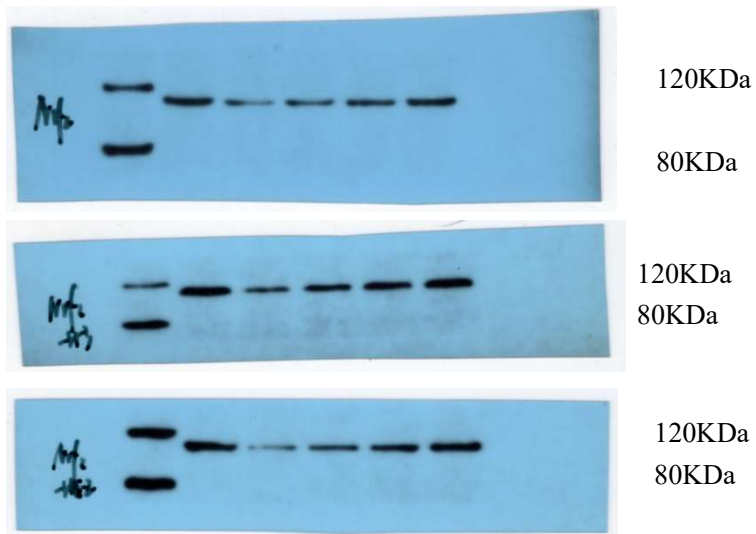

HO-1

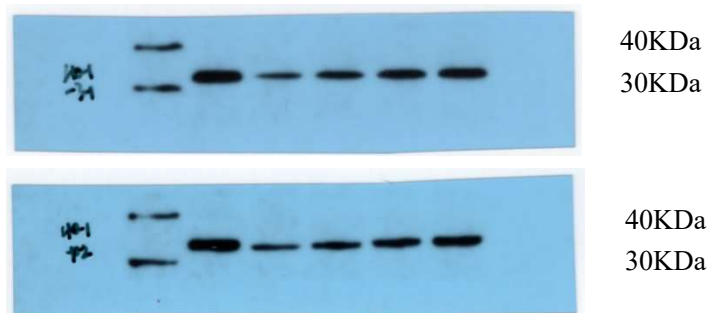

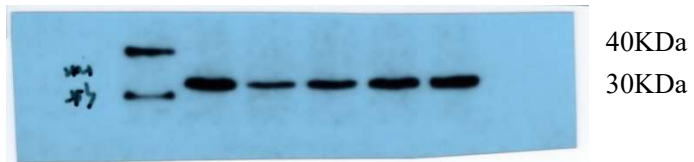

Fig 5

HO-1

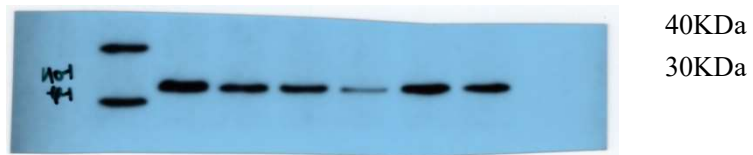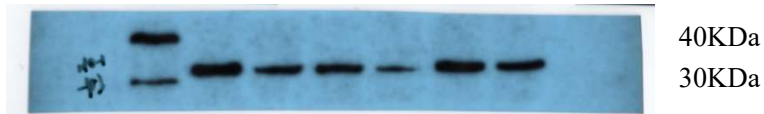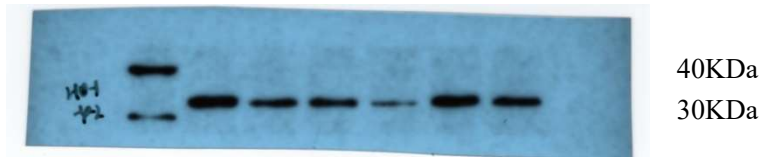

NLRP3

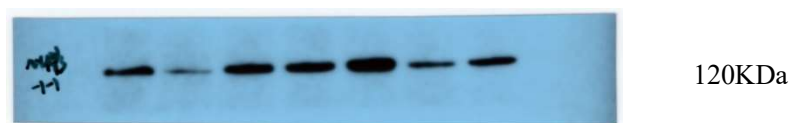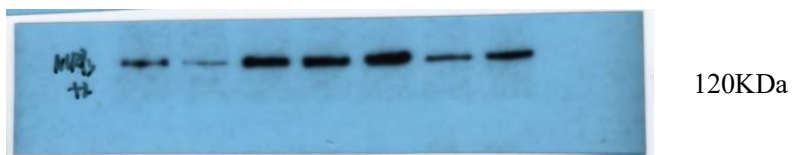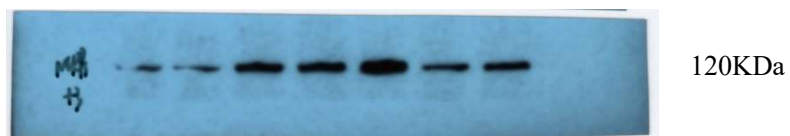

c-capsase-1

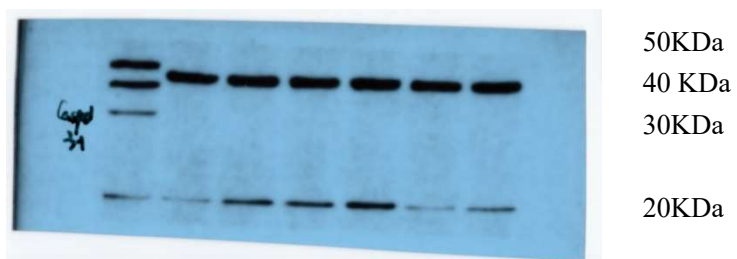

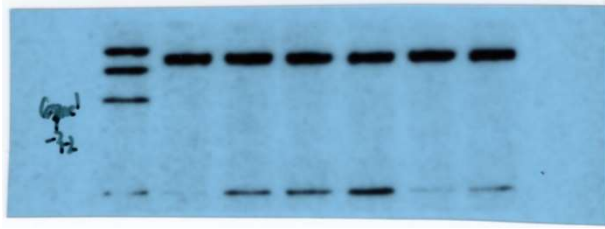

50KDa  
40 KDa  
30KDa  
20KDa

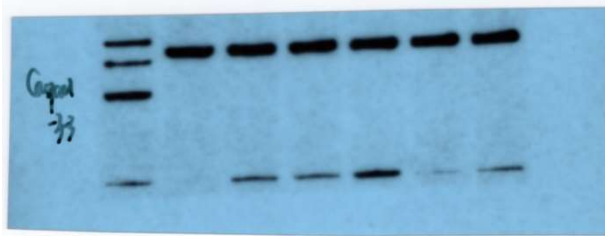

50KDa  
40 KDa  
30KDa  
20KDa

IL-1β

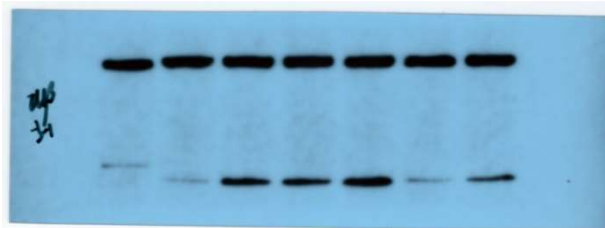

30KDa  
20KDa

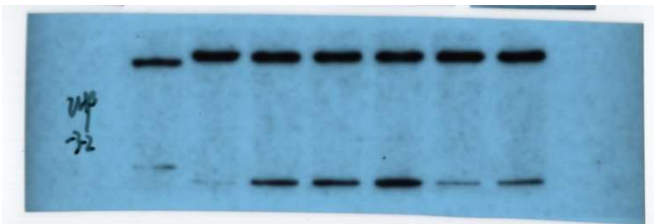

30KDa  
20KDa

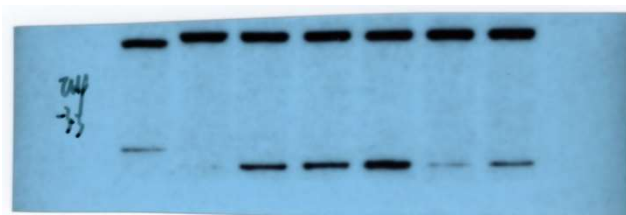

30KDa  
20KDa

IL-18

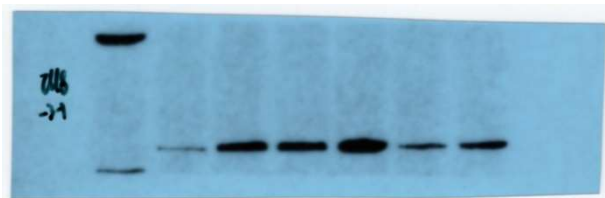

30KDa  
20KDa

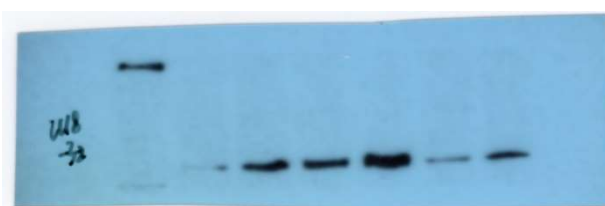

30KDa  
20KDa

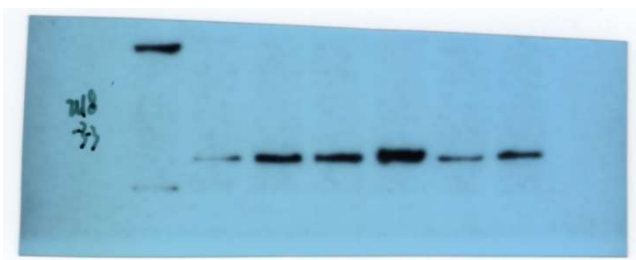

30KDa

20KDa
